# Supplementary material for: Effect of Centrifugal Force on Power Output of a Spin-Coated Poly(Vinylidene Fluoride-Trifluoroethylene)-Based Piezoelectric Nanogenerator
Source: MDPI journal article supplement (doi:10.3390/en16041892), 2023-02-14
Supplement: s1 [file s1]

# Supplementary Materials

## **Effect of Centrifugal Force on Power Output of a Spin-coated poly(vinylidene fluoride-trifluoroethylene)-based Piezoelectric Nanogenerator**

**Dong Geun Jeong <sup>1</sup>, Huidrom Hemojit Singh <sup>1</sup>, Mi Suk Kim <sup>1</sup> and Jong Hoon Jung <sup>1,\*</sup>**

<sup>1</sup>Department of Physics, Inha University, Incheon 22212, Republic of Korea

\*Corresponding author

Email: [jhjung@inha.ac.kr](mailto:jhjung@inha.ac.kr);

Tel: +82-32-860-7659;

Fax: +82-32-872-7562

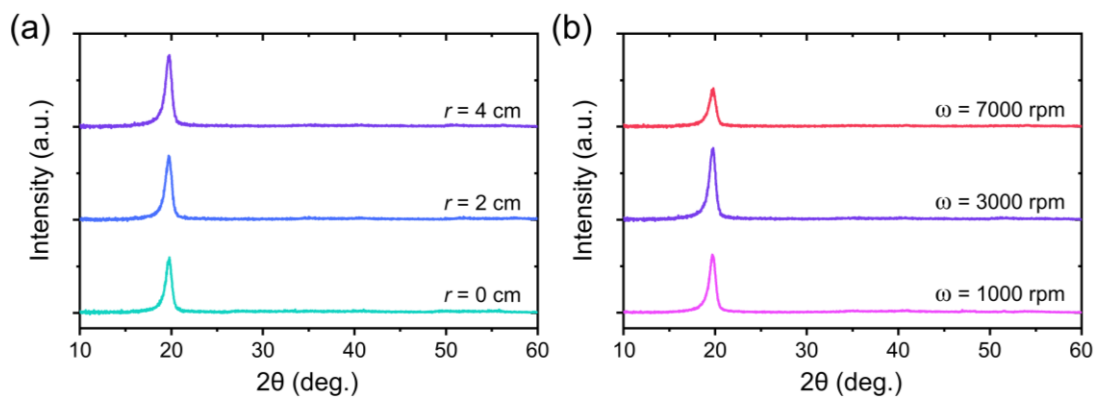

**Figure S1.** X-ray diffraction patterns of spin-coated P(VDF-TrFE) film specimens obtained at **(a)** various distances from the center and **(b)** under different rotational speeds for a wide diffraction angle of  $2\theta = 10^\circ\text{--}60^\circ$ .
